# Supplementary material for: Targeted gene silencing in mouse germ cells by insertion of a homologous DNA into a piRNA generating locus
Source: HighWire-hosted journal article supplement (doi:10.1101/gr.137224.112), 2012-11-06
Supplement: Supplemental_Figure_Legends.docx [file Supplemental_Figure_Legends.docx]

**SUPPLEMENTARY FIGURE LEGENDS**

**Supplementary Figure 1:** Generation of mice with an *EGFP-neo* insertion within the Watson piRNA cluster. **(A**) Outline of the knockin scheme. A diagram showing the overall structure of the knockin locus is shown (top). Location of the probes for Southern blotting and estimated sizes of the restriction fragments are also shown (bottom). (**B**) Southern blotting showing correct targeting. Genomic DNA was digested with either *Eco*RI or *Hin*dIII. *Eco*RI digests were hybridized with a 5’ external (blue) or an internal probe (green) and *Hin*dIII digests with a 3’ external probe (red). (**C**) Histological analysis of *EGFP-neo/+* testes. Specimens were obtained at seven weeks after birth and stained with hematoxyline-eosine. Arrows indicate spermatogonia (black), spermatocyte (green) and spermatid (blue).

**Supplementary Figure 2:** Distribution of small RNAs around the site of the insertion. (**A**) The read number of Watson cluster piRNAs mapped to the upstream and downstream regions of the knockin site. (B) Distribution of small RNA sequences in the knockin locus and/or surrounding regions in wildtype control (+/+) and *EGFP-neo/+* testes. The data is shown for 100-bp windows across the region.

**Supplementary Figure 3:** Characteristics of the endogenous piRNAs in the Watson and Crick clusters. The observed characteristics were very similar between the wildtype and *EGFP-neo/+* testes, and thus the data for only wildtype testes are shown. (**A**) Nucleotide preference at the first and tenth positions. (**B**) Frequent 10-nt complementarity between the 5’ regions of piRNAs from different strands. The data suggests the existence of an active ping-pong cycle. (**C**) Size distributions of piRNAs from different strands. See **Figure 2** legend for more details. Only unique sequence piRNAs were considered for this analysis.

**Supplementary Figure 4:** Purities of FACS isolated pachytene spermatocytes and round spermatids estimated by staining for the cell markers. Pachytene spermatocytes were stained withγH2AX and SYCP3 antibodies (left), and round spermatids with an MVH antibody (right). Insets are high magnification views of representative nuclei. The purity of FACS-sorted pachytene spermatocytes exceeded 70% and that of round spermatids exceeded 90%.

**Supplementary Figure 5:** Reporter gene repression in *EGFP-neo*/+ germ cells confirmed at the protein level. Total proteins extracted from FACS isolated germ cells were analyzed by Western blotting for GLB1 and EGFP proteins. Tubulin is the loading control.

**Supplementary Figure 6:** Generation and characterization of *Flag-Piwil2* BAC transgenic mice. (**A**) Construction of the transgene by modification of a BAC clone. A portion of the *Piwil2* gene encoding the N-terminal region of the protein was amplified and used to construct a 3x Flag vector with a kanamycin-resistance marker gene. The recombination cassette was generated using the plasmid as a template by amplification with primers having 50-nt sequences from the *Piwil2* gene. (**B**) Western blotting showing overexpression of PIWIL2. An antibody against PIWIL2 was used. WT, wildtype. (**C**) Immunostaining showing expression of FLAG-PIWIL2 in appropriate cells of the testis. FLAG-PIWIL2 in the testes of transgenic mice was detected with an anti-FLAG antibody and endogenous PIWIL2 in the wildtype (WT) testes was detected with an anti-PIWIL2 antibody. (**D**) Histological analysis showing rescue of the *Piwil2* knockoutphenotype by the *Flag-Piwil2* transgene. Sections from 5-week-old testes were stained with hematoxyline-eosine. The *Piwil2* knockout testes show developmental arrest of germ cells at the pachytene stage but introduction of the transgene restored normal spermatogenesis.

**Supplementary Figure 7:** DNA methylation status of *beta-geo* in the wildtype and *EGFP-neo+/–* germ cells. DNA was isolated from FACS-sorted germ cells and analyzed by bisulfite sequencing. Open and filled circles represent unmethylated and methylated cytosines, respectively.
