# Supplementary material for: Targeted gene silencing in mouse germ cells by insertion of a homologous DNA into a piRNA generating locus
Source: HighWire-hosted journal article supplement (doi:10.1101/gr.137224.112), 2012-11-06
Supplement: Supplemental_Table_1.docx [file Supplemental_Table_1.docx]

**Supplementary Table 1** Results of *EGFP-neo/+* mating

|  | Total | +/+ | *EGFP-neo*/+ | *EGFP-neo*/  *EGFP-neo* |
| --- | --- | --- | --- | --- |
| ♀+/+ X ♂*EGFP-neo*/+ | 49 | 21 | 28 | - |
| ♀*EGFP-neo/+* X ♂*EGFP-neo/*+ | 80 | 15 | 65 | 0 |
| ♀*EGFP-neo/+* X ♂*EGFP-neo/+* at E6.25* | 26 | 6 | 20 | 0 |

*Embryonic day 6.25.
