# Supplementary material for: Targeted gene silencing in mouse germ cells by insertion of a homologous DNA into a piRNA generating locus
Source: HighWire-hosted journal article supplement (doi:10.1101/gr.137224.112), 2012-11-06
Supplement: Supplemental_Table_2_.docx [file Supplemental_Table_2_.docx]

| **Supplementary Table 2** Read number of small RNAs mapped within each 100-bp segment of the knock-in sequence and endogenous sequence around it. | | | | | | | |
| --- | --- | --- | --- | --- | --- | --- | --- |
|  |  |  |  |  |  |  |  |
|  |  | Wildtype (+/+) | | *EGFP-neo*/+ | |  |  |
| Origin | Segment* | Watson strand | Crick strand | Watson strand | Crick strand |  |  |
| Chr.17 | 1-100 | 100 | 0 | 100 | 0 |  |  |
| Chr.17 | 101-200 | 27 | 0 | 40 | 1 |  |  |
| Chr.17 | 201-300 | 90 | 0 | 129 | 0 |  |  |
| Chr.17 | 301-400 | 1503 | 0 | 1701 | 0 |  |  |
| Chr.17 | 401-500 | 22 | 1 | 18 | 3 |  |  |
| Chr.17 | 501-600 | 12 | 0 | 11 | 0 |  |  |
| Chr.17 | 601-700 | 121 | 0 | 125 | 2 |  |  |
| Chr.17 | 701-800 | 31 | 0 | 36 | 0 |  |  |
| Chr.17 | 801-900 | 131 | 0 | 159 | 2 |  |  |
| Chr.17 | 901-1000 | 131 | 0 | 130 | 0 |  |  |
| Chr.17 | 1001-1100 | 44 | 0 | 52 | 0 |  |  |
| Chr.17 | 1001-1200 | 159 | 0 | 177 | 0 |  |  |
| Chr.17 | 1201-1300 | 130 | 1 | 172 | 0 |  |  |
| Chr.17 | 1301-1400 | 71 | 0 | 86 | 2 |  |  |
| Chr.17 | 1401-1500 | 1791 | 0 | 2337 | 0 |  |  |
| Chr.17 | 1501-1600 | 35 | 0 | 53 | 0 |  |  |
| Chr.17 | 1601-1700 | 173 | 1 | 216 | 0 |  |  |
| Chr.17 | 1701-1800 | 7 | 18 | 11 | 18 |  |  |
| Chr.17 | 1801-1900 | 32 | 17 | 30 | 37 |  |  |
| Chr.17 | 1901-2000 | 188 | 1 | 201 | 3 |  |  |
| Chr.17 | 2001-2100 | 116 | 24 | 117 | 58 |  |  |
| Chr.17 | 2101-2200 | 137 | 10 | 155 | 30 |  |  |
| Chr.17 | 2201-2300 | 84 | 15 | 123 | 22 |  |  |
| Chr.17 | 2301-2400 | 478 | 36 | 441 | 61 |  |  |
| Chr.17 | 2401-2500 | 69 | 1 | 90 | 0 |  |  |
| Chr.17 | 2501-2600 | 419 | 3 | 486 | 1 |  |  |
| Chr.17 | 2601-2700 | 20 | 1 | 28 | 2 |  |  |
| Chr.17 | 2701-2800 | 486 | 1 | 481 | 4 |  |  |
| Chr.17 | 2801-2900 | 108 | 0 | 92 | 1 |  |  |
| Chr.17 | 2901-3000 | 117 | 0 | 108 | 0 |  |  |
| Chr.17 | 3001-3100 | 53 | 0 | 64 | 0 |  |  |
| Chr.17 | 3101-3200 | 7105 | 1 | 12091 | 1 |  |  |
| Chr.17 | 3201-3300 | 872 | 0 | 804 | 3 |  |  |
| Chr.17 | 3301-3400 | 384 | 0 | 321 | 0 |  |  |
| Chr.17 | 3401-3500 | 54 | 0 | 60 | 0 |  |  |
| Chr.17 | 3501-3600 | 604 | 0 | 290 | 4 |  |  |
| Chr.17 | 3601-3700 | 321 | 0 | 192 | 1 |  |  |
| Chr.17 | 3701-3800 | 2041 | 1 | 1912 | 1 |  |  |
| Chr.17 | 3801-3900 | 416 | 0 | 441 | 1 |  |  |
| Chr.17 | 3901-4000 | 1849 | 1 | 1692 | 1 |  |  |
| Chr.17 | 4001-4100 | 174 | 0 | 135 | 0 |  |  |
| Chr.17 | 4101-4200 | 280 | 0 | 293 | 0 |  |  |
| Chr.17 | 4201-4300 | 146 | 0 | 115 | 0 |  |  |
| Chr.17 | 4301-4400 | 174 | 0 | 112 | 2 |  |  |
| Chr.17 | 4401-4500 | 106 | 0 | 75 | 0 |  |  |
| Chr.17 | 4501-4600 | 91 | 0 | 123 | 0 |  |  |
| Chr.17 | 4601-4700 | 14 | 0 | 13 | 0 |  |  |
| Chr.17 | 4701-4800 | 228 | 23 | 252 | 113 |  |  |
| Chr.17 | 4801-4900 | 41 | 0 | 22 | 1 |  |  |
| Chr.17+*EGFP* | 4901-5000 | 2128 | 0 | 1772 | 0 |  |  |
| *EGFP* | 5001-5100 | 0 | 0 | 102 | 3 |  | antisense piRNAs |
| *EGFP* | 5101-5200 | 0 | 0 | 41 | 184 |  | sense piRNAs |
| *EGFP* | 5201-5300 | 0 | 0 | 838 | 0 |  |  |
| *EGFP* | 5301-5400 | 1 | 0 | 57 | 1 |  |  |
| *EGFP* | 5401-5500 | 0 | 0 | 14 | 3 |  |  |
| *EGFP*+Vector | 5501-5600 | 0 | 0 | 26 | 8 |  |  |
| Vector | 5601-5700 | 0 | 0 | 39 | 7 |  |  |
| Vector | 5701-5800 | 0 | 0 | 1 | 0 |  |  |
| Vector | 5801-5900 | 0 | 0 | 31 | 7 |  |  |
| Vector | 5901-6000 | 0 | 0 | 45 | 1 |  |  |
| Vector+*neo* | 6001-6100 | 0 | 0 | 69 | 9 |  |  |
| *neo* | 6101-6200 | 0 | 0 | 13 | 16 |  |  |
| *neo* | 6201-6300 | 0 | 0 | 39 | 134 |  |  |
| *neo* | 6301-6400 | 0 | 0 | 134 | 26 |  |  |
| *neo* | 6401-6500 | 0 | 0 | 41 | 1 |  |  |
| *neo* | 6501-6600 | 0 | 0 | 70 | 9 |  |  |
| *neo* | 6601-6700 | 0 | 0 | 16 | 19 |  |  |
| *neo*+Vector | 6701-6800 | 0 | 0 | 1 | 23 |  |  |
| Vector | 6801-6900 | 0 | 0 | 15 | 1 |  |  |
| Vector | 6901-7000 | 0 | 0 | 2 | 0 |  |  |
| Vector | 7001-7100 | 0 | 0 | 19 | 1 |  |  |
| Vector | 7101-7200 | 0 | 0 | 13 | 0 |  |  |
| Vector | 7201-7300 | 0 | 0 | 19 | 0 |  |  |
| Vector+Chr.17 | 7301-7400 | 0 | 0 | 26 | 0 |  |  |
| Chr.17 | 7401-7500 | 778 | 0 | 727 | 0 |  |  |
| Chr.17 | 7501-7600 | 317 | 0 | 260 | 0 |  |  |
| Chr.17 | 7601-7700 | 59 | 1 | 52 | 0 |  |  |
| Chr.17 | 7701-7800 | 254 | 1 | 218 | 1 |  |  |
| Chr.17 | 7801-7900 | 219 | 0 | 141 | 0 |  |  |
| Chr.17 | 7901-8000 | 255 | 0 | 332 | 0 |  |  |
| Chr.17 | 8001-8100 | 810 | 0 | 885 | 0 |  |  |
| Chr.17 | 8101-8200 | 225 | 3 | 209 | 14 |  |  |
| Chr.17 | 8201-8300 | 32 | 3 | 15 | 1 |  |  |
| Chr.17 | 8301-8400 | 53 | 0 | 71 | 0 |  |  |
| Chr.17 | 8401-8500 | 977 | 0 | 751 | 0 |  |  |
| Chr.17 | 8501-8600 | 25 | 0 | 10 | 0 |  |  |
| Chr.17 | 8601-8700 | 36 | 0 | 28 | 0 |  |  |
| Chr.17 | 8701-8800 | 306 | 0 | 293 | 0 |  |  |
| Chr.17 | 8801-8900 | 30 | 0 | 18 | 0 |  |  |
| Chr.17 | 8901-9000 | 36 | 0 | 19 | 0 |  |  |
| Chr.17 | 9001-9100 | 42 | 0 | 47 | 0 |  |  |
| Chr.17 | 9101-9200 | 7323 | 4 | 9987 | 2 |  |  |
| Chr.17 | 9201-9300 | 133 | 0 | 94 | 2 |  |  |
| Chr.17 | 9301-9400 | 86 | 0 | 6 | 2 |  |  |
| Chr.17 | 9401-9500 | 2931 | 0 | 3884 | 0 |  |  |
| Chr.17 | 9501-9600 | 303 | 0 | 269 | 0 |  |  |
| Chr.17 | 9601-9700 | 16 | 0 | 20 | 0 |  |  |
| Chr.17 | 9701-9800 | 78 | 4 | 91 | 7 |  |  |
| Chr.17 | 9801-9900 | 683 | 4 | 755 | 7 |  |  |
| Chr.17 | 9901-10000 | 24 | 0 | 23 | 0 |  |  |
| Chr.17 | 10001-10100 | 209 | 0 | 293 | 0 |  |  |
| Chr.17 | 10101-10200 | 552 | 0 | 749 | 0 |  |  |
| Chr.17 | 10201-10300 | 60 | 0 | 91 | 0 |  |  |
| Chr.17 | 10301-10400 | 73 | 1 | 75 | 0 |  |  |
| Chr.17 | 10401-10500 | 93 | 1 | 75 | 3 |  |  |
| Chr.17 | 10501-10600 | 59 | 0 | 24 | 3 |  |  |
| Chr.17 | 10601-10700 | 39 | 0 | 32 | 1 |  |  |
| Chr.17 | 10701-10800 | 12 | 0 | 10 | 1 |  |  |
| Chr.17 | 10801-10900 | 57 | 0 | 40 | 0 |  |  |
| Chr.17 | 10901-11000 | 1070 | 1 | 1221 | 0 |  |  |
| Chr.17 | 11001-11100 | 55 | 0 | 51 | 1 |  |  |
| Chr.17 | 11101-11200 | 313 | 2 | 404 | 1 |  |  |
| Chr.17 | 11201-11300 | 24 | 4 | 16 | 1 |  |  |
| Chr.17 | 11301-11400 | 388 | 2 | 404 | 2 |  |  |
| Chr.17 | 11401-11500 | 14 | 3 | 9 | 3 |  |  |
| Chr.17 | 11501-11600 | 56 | 2 | 81 | 3 |  |  |
| Chr.17 | 11601-11700 | 294 | 1 | 362 | 1 |  |  |
| Chr.17 | 11701-11800 | 28 | 0 | 24 | 0 |  |  |
| Chr.17 | 11801-11900 | 9 | 2 | 5 | 1 |  |  |
| Chr.17 | 11901-12000 | 129 | 0 | 167 | 0 |  |  |
| Chr.17 | 12001-12100 | 794 | 0 | 765 | 0 |  |  |
| Chr.17 | 12101-12200 | 219 | 0 | 194 | 0 |  |  |
| Chr.17 | 12201-12300 | 254 | 0 | 200 | 0 |  |  |
| Chr.17 | 12301-12400 | 655 | 2 | 682 | 0 |  |  |

*The region corresponds to mm9 chr.17: 27,466,881-27,476,760 in wildtype mice and the size of the *EGFP-neo* knock-in sequence is about 2.6 kb.
