# Supplementary material for: Targeted gene silencing in mouse germ cells by insertion of a homologous DNA into a piRNA generating locus
Source: HighWire-hosted journal article supplement (doi:10.1101/gr.137224.112), 2012-11-06
Supplement: Supplemental_Table_3.docx [file Supplemental_Table_3.docx]

| **Supplementary Table 3** Sequence of small RNAs derived from *EGFP* and *neo*. | | | |  |  |
| --- | --- | --- | --- | --- | --- |
|  |  |  |  |  |  |
| Small RNAs derived from *neo* |  |  |  |  |  |
| Sequence | Length | Start | End | Read | Strand |
| CTGCGAATCGGGAGCGGCGATACCGTAA | 28 | 159120 | 159147 | 1 | Watson |
|  |  |  |  |  |  |
| TGCGAATCGGGAGCGGCGATACCGTAA | 27 | 159121 | 159147 | 1 | Watson |
|  |  |  |  |  |  |
| TACCGTAAAGCACGAGGAAGCGGTC | 25 | 159140 | 159164 | 1 | Watson |
|  |  |  |  |  |  |
| TAAAGCACGAGGAAGCGGTCAGCCCAT | 27 | 159145 | 159171 | 1 | Watson |
|  |  |  |  |  |  |
| TAAAGCACGAGGAAGCGGTCAGCCCATT | 28 | 159145 | 159172 | 1 | Watson |
|  |  |  |  |  |  |
| TGGGCTGACCGCTTCCTCGTGCTTTACGG | 29 | 159170 | 159142 | 1 | Crick |
|  |  |  |  |  |  |
| TTCAGCAATATCACGGGTAGCCAACGC | 27 | 159186 | 159212 | 1 | Watson |
|  |  |  |  |  |  |
| CTGAAGAGCTTGGCGGCGAATGGGCTGACCGC | 32 | 159190 | 159159 | 1 | Crick |
|  |  |  |  |  |  |
| TGCTGAAGAGCTTGGCGGCGAATGG | 25 | 159192 | 159168 | 1 | Crick |
|  |  |  |  |  |  |
| TTGCTGAAGAGCTTGGCGGCGAATGGGCTG | 30 | 159193 | 159164 | 1 | Crick |
|  |  |  |  |  |  |
| TATCACGGGTAGCCAACGCTATGTCC | 26 | 159194 | 159219 | 1 | Watson |
|  |  |  |  |  |  |
| TATTGCTGAAGAGCTTGGCGGCGAAT | 26 | 159195 | 159170 | 2 | Crick |
|  |  |  |  |  |  |
| TATTGCTGAAGAGCTTGGCGGCGAATGGGCT | 31 | 159195 | 159165 | 1 | Crick |
|  |  |  |  |  |  |
| CCGTGATATTGCTGAAGAGCTTGGCGGCG | 29 | 159201 | 159173 | 1 | Crick |
|  |  |  |  |  |  |
| TATGTCCTGATAGCGGTCCGCCACA | 25 | 159213 | 159237 | 1 | Watson |
|  |  |  |  |  |  |
| TATGTCCTGATAGCGGTCCGCCACACC | 27 | 159213 | 159239 | 3 | Watson |
|  |  |  |  |  |  |
| TGATAGCGGTCCGCCACACCCAGCCGGCCA | 30 | 159220 | 159249 | 1 | Watson |
|  |  |  |  |  |  |
| TATCAGGACATAGCGTTGGCTAC | 23 | 159224 | 159202 | 1 | Crick |
|  |  |  |  |  |  |
| TATCAGGACATAGCGTTGGCTACCCGTGA | 29 | 159224 | 159196 | 1 | Crick |
|  |  |  |  |  |  |
| CAGTCGATGAATCCAGAAAAGCGGCC | 26 | 159250 | 159275 | 1 | Watson |
|  |  |  |  |  |  |
| CAGTCGATGAATCCAGAAAAGCGGCCA | 27 | 159250 | 159276 | 1 | Watson |
|  |  |  |  |  |  |
| TCGATGAATCCAGAAAAGCGGCCATTT | 27 | 159253 | 159279 | 1 | Watson |
|  |  |  |  |  |  |
| TGAATCCAGAAAAGCGGCCATTTTCC | 26 | 159257 | 159282 | 1 | Watson |
|  |  |  |  |  |  |
| TGAATCCAGAAAAGCGGCCATTTTCCA | 27 | 159257 | 159283 | 1 | Watson |
|  |  |  |  |  |  |
| TGAATCCAGAAAAGCGGCCATTTTCCACC | 29 | 159257 | 159285 | 1 | Watson |
|  |  |  |  |  |  |
| TCATCGACTGTGGCCGGCTGGGTG | 24 | 159259 | 159236 | 1 | Crick |
|  |  |  |  |  |  |
| TCATCGACTGTGGCCGGCTGGGTGTGG | 27 | 159259 | 159233 | 1 | Crick |
|  |  |  |  |  |  |
| GATTCATCGACTGTGGCCGGCTGG | 24 | 159262 | 159239 | 1 | Crick |
|  |  |  |  |  |  |
| GGATTCATCGACTGTGGCCGGCT | 23 | 159263 | 159241 | 1 | Crick |
|  |  |  |  |  |  |
| TGGATTCATCGACTGTGGCCGGCTGGG | 27 | 159264 | 159238 | 1 | Crick |
|  |  |  |  |  |  |
| TGGATTCATCGACTGTGGCCGGCTGGGTG | 29 | 159264 | 159236 | 2 | Crick |
|  |  |  |  |  |  |
| CTGGATTCATCGACTGTGGCCGGCTGGG | 28 | 159265 | 159238 | 1 | Crick |
|  |  |  |  |  |  |
| TCTGGATTCATCGACTGTGGCCGGCTGG | 28 | 159266 | 159239 | 3 | Crick |
|  |  |  |  |  |  |
| TTTTCCACCATGATATTCGGCAAGCA | 26 | 159277 | 159302 | 1 | Watson |
|  |  |  |  |  |  |
| TTTCCACCATGATATTCGGCAAGCAG | 26 | 159278 | 159303 | 1 | Watson |
|  |  |  |  |  |  |
| TTCCACCATGATATTCGGCAAGCAGGCATC | 30 | 159279 | 159308 | 1 | Watson |
|  |  |  |  |  |  |
| CCATGATATTCGGCAAGCAGGCATC | 25 | 159284 | 159308 | 1 | Watson |
|  |  |  |  |  |  |
| TGATATTCGGCAAGCAGGCATC | 22 | 159287 | 159308 | 1 | Watson |
|  |  |  |  |  |  |
| TGATATTCGGCAAGCAGGCATCGCC | 25 | 159287 | 159311 | 1 | Watson |
|  |  |  |  |  |  |
| TGATATTCGGCAAGCAGGCATCGCCA | 26 | 159287 | 159312 | 5 | Watson |
|  |  |  |  |  |  |
| TGATATTCGGCAAGCAGGCATCGCCAT | 27 | 159287 | 159313 | 11 | Watson |
|  |  |  |  |  |  |
| TGATATTCGGCAAGCAGGCATCGCCATG | 28 | 159287 | 159314 | 11 | Watson |
|  |  |  |  |  |  |
| ATTCGGCAAGCAGGCATCGCCAT | 23 | 159291 | 159313 | 1 | Watson |
|  |  |  |  |  |  |
| TTCGGCAAGCAGGCATCGCCAT | 22 | 159292 | 159313 | 1 | Watson |
|  |  |  |  |  |  |
| CCGAATATCATGGTGGAAAATGGCCGCTTT | 30 | 159296 | 159267 | 3 | Crick |
|  |  |  |  |  |  |
| CCGAATATCATGGTGGAAAATGGCCGCTTTT | 31 | 159296 | 159266 | 1 | Crick |
|  |  |  |  |  |  |
| TCGCCGTCGGGCATGCGCGCCTTGA | 25 | 159331 | 159355 | 1 | Watson |
|  |  |  |  |  |  |
| TGGCGAACAGTTCGGCTGGCGCGAGCCC | 28 | 159359 | 159386 | 1 | Watson |
|  |  |  |  |  |  |
| CGAACAGTTCGGCTGGCGCGAGCCCCT | 27 | 159362 | 159388 | 2 | Watson |
|  |  |  |  |  |  |
| TGATGCTCTTCGTCCAGATCATCCTGATCGA | 31 | 159388 | 159418 | 2 | Watson |
|  |  |  |  |  |  |
| TGGACGAAGAGCATCAGGGGCTCGCGCCAGC | 31 | 159403 | 159373 | 2 | Crick |
|  |  |  |  |  |  |
| TCTGGACGAAGAGCATCAGGGGCTCG | 26 | 159405 | 159380 | 1 | Crick |
|  |  |  |  |  |  |
| TCTGGACGAAGAGCATCAGGGGCTCGCGC | 29 | 159405 | 159377 | 1 | Crick |
|  |  |  |  |  |  |
| ATCTGGACGAAGAGCATCAGGGGC | 24 | 159406 | 159383 | 1 | Crick |
|  |  |  |  |  |  |
| TCATCCTGATCGACAAGACCGGCTT | 25 | 159406 | 159430 | 1 | Watson |
|  |  |  |  |  |  |
| TCATCCTGATCGACAAGACCGGCTTC | 26 | 159406 | 159431 | 1 | Watson |
|  |  |  |  |  |  |
| TCATCCTGATCGACAAGACCGGCTTCC | 27 | 159406 | 159432 | 1 | Watson |
|  |  |  |  |  |  |
| TCATCCTGATCGACAAGACCGGCTTCCATCC | 31 | 159406 | 159436 | 1 | Watson |
|  |  |  |  |  |  |
| ATGATCTGGACGAAGAGCAT | 20 | 159409 | 159390 | 1 | Crick |
|  |  |  |  |  |  |
| TCCTGATCGACAAGACCGGCT | 21 | 159409 | 159429 | 1 | Watson |
|  |  |  |  |  |  |
| TCCTGATCGACAAGACCGGCTT | 22 | 159409 | 159430 | 4 | Watson |
|  |  |  |  |  |  |
| TCCTGATCGACAAGACCGGCTTC | 23 | 159409 | 159431 | 6 | Watson |
|  |  |  |  |  |  |
| TCCTGATCGACAAGACCGGCTTCC | 24 | 159409 | 159432 | 4 | Watson |
|  |  |  |  |  |  |
| TCCTGATCGACAAGACCGGCTTCCA | 25 | 159409 | 159433 | 11 | Watson |
|  |  |  |  |  |  |
| TCCTGATCGACAAGACCGGCTTCCAT | 26 | 159409 | 159434 | 9 | Watson |
|  |  |  |  |  |  |
| TCCTGATCGACAAGACCGGCTTCCATC | 27 | 159409 | 159435 | 29 | Watson |
|  |  |  |  |  |  |
| TCCTGATCGACAAGACCGGCTTCCATCC | 28 | 159409 | 159436 | 11 | Watson |
|  |  |  |  |  |  |
| TCCTGATCGACAAGACCGGCTTCCATCCG | 29 | 159409 | 159437 | 3 | Watson |
|  |  |  |  |  |  |
| TCCTGATCGACAAGACCGGCTTCCATCCGA | 30 | 159409 | 159438 | 4 | Watson |
|  |  |  |  |  |  |
| CCTGATCGACAAGACCGGCTTCCATCC | 27 | 159410 | 159436 | 1 | Watson |
|  |  |  |  |  |  |
| TGATCGACAAGACCGGCTTCCATCC | 25 | 159412 | 159436 | 5 | Watson |
|  |  |  |  |  |  |
| TGATCGACAAGACCGGCTTCCATCCG | 26 | 159412 | 159437 | 1 | Watson |
|  |  |  |  |  |  |
| TGATCGACAAGACCGGCTTCCATCCGAGT | 29 | 159412 | 159440 | 1 | Watson |
|  |  |  |  |  |  |
| CAGGATGATCTGGACGAAGAGCATCAGGG | 29 | 159413 | 159385 | 1 | Crick |
|  |  |  |  |  |  |
| ATCGACAAGACCGGCTTCCATCCG | 24 | 159414 | 159437 | 1 | Watson |
|  |  |  |  |  |  |
| TCAGGATGATCTGGACGAAGAGCATCAG | 28 | 159414 | 159387 | 1 | Crick |
|  |  |  |  |  |  |
| GATCAGGATGATCTGGACGAAGAGCATC | 28 | 159416 | 159389 | 1 | Crick |
|  |  |  |  |  |  |
| TCGATCAGGATGATCTGGACG | 21 | 159418 | 159398 | 1 | Crick |
|  |  |  |  |  |  |
| TCGATCAGGATGATCTGGACGAAGAGC | 27 | 159418 | 159392 | 1 | Crick |
|  |  |  |  |  |  |
| TCGATCAGGATGATCTGGACGAAGAGCA | 28 | 159418 | 159391 | 10 | Crick |
|  |  |  |  |  |  |
| TCGATCAGGATGATCTGGACGAAGAGCAT | 29 | 159418 | 159390 | 29 | Crick |
|  |  |  |  |  |  |
| TCGATCAGGATGATCTGGACGAAGAGCATC | 30 | 159418 | 159389 | 75 | Crick |
|  |  |  |  |  |  |
| TCGATCAGGATGATCTGGACGAAGAGCATCA | 31 | 159418 | 159388 | 1 | Crick |
|  |  |  |  |  |  |
| TTGTCGATCAGGATGATCTGGACGAAGA | 28 | 159421 | 159394 | 1 | Crick |
|  |  |  |  |  |  |
| TTGTCGATCAGGATGATCTGGACGAAGAGC | 30 | 159421 | 159392 | 5 | Crick |
|  |  |  |  |  |  |
| GTCTTGTCGATCAGGATGATCTGGACGAA | 29 | 159424 | 159396 | 1 | Crick |
|  |  |  |  |  |  |
| GTCTTGTCGATCAGGATGATCTGGACGAAG | 30 | 159424 | 159395 | 1 | Crick |
|  |  |  |  |  |  |
| TCGGATGGAAGCCGGTCTTGTCGATCAGG | 29 | 159438 | 159410 | 3 | Crick |
|  |  |  |  |  |  |
| TCGGATGGAAGCCGGTCTTGTCGATCAGGA | 30 | 159438 | 159409 | 1 | Crick |
|  |  |  |  |  |  |
| CTCGGATGGAAGCCGGTCTTGTCGATCAGGA | 31 | 159439 | 159409 | 1 | Crick |
|  |  |  |  |  |  |
| GCACGTACTCGGATGGAAGCCGGT | 24 | 159446 | 159423 | 1 | Crick |
|  |  |  |  |  |  |
| AGCGAGCACGTACTCGGATGGAAGCCGGT | 29 | 159451 | 159423 | 1 | Crick |
|  |  |  |  |  |  |
| TCGATGCGATGTTTCGCTTGGTGGTCGA | 28 | 159451 | 159478 | 1 | Watson |
|  |  |  |  |  |  |
| GATGCGATGTTTCGCTTGGTGGTCGA | 26 | 159453 | 159478 | 2 | Watson |
|  |  |  |  |  |  |
| TGCGATGTTTCGCTTGGTGGTCG | 23 | 159455 | 159477 | 2 | Watson |
|  |  |  |  |  |  |
| TGCGATGTTTCGCTTGGTGGTCGAAT | 26 | 159455 | 159480 | 7 | Watson |
|  |  |  |  |  |  |
| TGCGATGTTTCGCTTGGTGGTCGAATG | 27 | 159455 | 159481 | 5 | Watson |
|  |  |  |  |  |  |
| TGCGATGTTTCGCTTGGTGGTCGAATGG | 28 | 159455 | 159482 | 1 | Watson |
|  |  |  |  |  |  |
| TGCGATGTTTCGCTTGGTGGTCGAATGGG | 29 | 159455 | 159483 | 1 | Watson |
|  |  |  |  |  |  |
| TGCGATGTTTCGCTTGGTGGTCGAATGGGC | 30 | 159455 | 159484 | 13 | Watson |
|  |  |  |  |  |  |
| ATCGCATCGAGCGAGCACGTACTCGGATGGA | 31 | 159460 | 159430 | 1 | Crick |
|  |  |  |  |  |  |
| TGTTTCGCTTGGTGGTCGAATGGGC | 25 | 159460 | 159484 | 1 | Watson |
|  |  |  |  |  |  |
| AAACATCGCATCGAGCGAGCACGTAC | 26 | 159464 | 159439 | 1 | Crick |
|  |  |  |  |  |  |
| AAACATCGCATCGAGCGAGCACGTACTCGG | 30 | 159464 | 159435 | 5 | Crick |
|  |  |  |  |  |  |
| AAACATCGCATCGAGCGAGCACGTACTCGGA | 31 | 159464 | 159434 | 10 | Crick |
|  |  |  |  |  |  |
| AAGCGAAACATCGCATCGAGCGAGCACGT | 29 | 159469 | 159441 | 1 | Crick |
|  |  |  |  |  |  |
| TGGTGGTCGAATGGGCAGGT | 20 | 159469 | 159488 | 1 | Watson |
|  |  |  |  |  |  |
| GGTGGTCGAATGGGCAGGTAGCCGGA | 26 | 159470 | 159495 | 1 | Watson |
|  |  |  |  |  |  |
| TCGAATGGGCAGGTAGCCGGAT | 22 | 159475 | 159496 | 1 | Watson |
|  |  |  |  |  |  |
| TCGAATGGGCAGGTAGCCGGATCA | 24 | 159475 | 159498 | 1 | Watson |
|  |  |  |  |  |  |
| TCGAATGGGCAGGTAGCCGGATCAAGCGT | 29 | 159475 | 159503 | 2 | Watson |
|  |  |  |  |  |  |
| CGAATGGGCAGGTAGCCGGATCAAGCG | 27 | 159476 | 159502 | 1 | Watson |
|  |  |  |  |  |  |
| TGGGCAGGTAGCCGGATCAAGCGTATGC | 28 | 159480 | 159507 | 1 | Watson |
|  |  |  |  |  |  |
| CGGCTGCATACGCTTGATCCGGCTA | 25 | 159512 | 159488 | 1 | Crick |
|  |  |  |  |  |  |
| TCAGCCATGATGGATACTTTCTCGGCA | 27 | 159523 | 159549 | 1 | Watson |
|  |  |  |  |  |  |
| CAGCCATGATGGATACTTTCTCGGCA | 26 | 159524 | 159549 | 2 | Watson |
|  |  |  |  |  |  |
| CAGCCATGATGGATACTTTCTCGGCAG | 27 | 159524 | 159550 | 1 | Watson |
|  |  |  |  |  |  |
| TGATGGATACTTTCTCGGCAGG | 22 | 159530 | 159551 | 1 | Watson |
|  |  |  |  |  |  |
| TGATGGATACTTTCTCGGCAGGA | 23 | 159530 | 159552 | 1 | Watson |
|  |  |  |  |  |  |
| TGATGGATACTTTCTCGGCAGGAGC | 25 | 159530 | 159554 | 2 | Watson |
|  |  |  |  |  |  |
| TGATGGATACTTTCTCGGCAGGAGCA | 26 | 159530 | 159555 | 12 | Watson |
|  |  |  |  |  |  |
| TGATGGATACTTTCTCGGCAGGAGCAA | 27 | 159530 | 159556 | 1 | Watson |
|  |  |  |  |  |  |
| TGATGGATACTTTCTCGGCAGGAGCAAG | 28 | 159530 | 159557 | 2 | Watson |
|  |  |  |  |  |  |
| TACTTTCTCGGCAGGAGCAA | 20 | 159537 | 159556 | 1 | Watson |
|  |  |  |  |  |  |
| TACTTTCTCGGCAGGAGCAAGG | 22 | 159537 | 159558 | 2 | Watson |
|  |  |  |  |  |  |
| TACTTTCTCGGCAGGAGCAAGGTG | 24 | 159537 | 159560 | 2 | Watson |
|  |  |  |  |  |  |
| TACTTTCTCGGCAGGAGCAAGGTGA | 25 | 159537 | 159561 | 5 | Watson |
|  |  |  |  |  |  |
| GTATCCATCATGGCTGATGCAATGC | 25 | 159539 | 159515 | 1 | Crick |
|  |  |  |  |  |  |
| TTCTCGGCAGGAGCAAGGTGAGATGACAGG | 30 | 159541 | 159570 | 1 | Watson |
|  |  |  |  |  |  |
| TGAGATGACAGGAGATCCTGCCCCGGC | 27 | 159559 | 159585 | 1 | Watson |
|  |  |  |  |  |  |
| TGAGATGACAGGAGATCCTGCCCCGGCA | 28 | 159559 | 159586 | 1 | Watson |
|  |  |  |  |  |  |
| GATGACAGGAGATCCTGCCCCGGCACTT | 28 | 159562 | 159589 | 1 | Watson |
|  |  |  |  |  |  |
| TTCCCGCTTCAGTGACAACGTCGAGCACA | 29 | 159611 | 159639 | 1 | Watson |
|  |  |  |  |  |  |
| TTCAGTGACAACGTCGAGCACAGCTGCG | 28 | 159618 | 159645 | 1 | Watson |
|  |  |  |  |  |  |
| TTCAGTGACAACGTCGAGCACAGCTGCGCAA | 31 | 159618 | 159648 | 1 | Watson |
|  |  |  |  |  |  |
| TCAGTGACAACGTCGAGCACAGCTGC | 26 | 159619 | 159644 | 1 | Watson |
|  |  |  |  |  |  |
| TCAGTGACAACGTCGAGCACAGCTGCGC | 28 | 159619 | 159646 | 2 | Watson |
|  |  |  |  |  |  |
| GTGACAACGTCGAGCACAGCTGCGCA | 26 | 159622 | 159647 | 1 | Watson |
|  |  |  |  |  |  |
| GTGACAACGTCGAGCACAGCTGCGCAAG | 28 | 159622 | 159649 | 1 | Watson |
|  |  |  |  |  |  |
| GTGACAACGTCGAGCACAGCTGCGCAAGGA | 30 | 159622 | 159651 | 1 | Watson |
|  |  |  |  |  |  |
| TGACAACGTCGAGCACAGCTGCGCA | 25 | 159623 | 159647 | 7 | Watson |
|  |  |  |  |  |  |
| TGACAACGTCGAGCACAGCTGCGCAA | 26 | 159623 | 159648 | 23 | Watson |
|  |  |  |  |  |  |
| TGACAACGTCGAGCACAGCTGCGCAAG | 27 | 159623 | 159649 | 13 | Watson |
|  |  |  |  |  |  |
| TGACAACGTCGAGCACAGCTGCGCAAGG | 28 | 159623 | 159650 | 4 | Watson |
|  |  |  |  |  |  |
| TGACAACGTCGAGCACAGCTGCGCAAGGA | 29 | 159623 | 159651 | 6 | Watson |
|  |  |  |  |  |  |
| TGACAACGTCGAGCACAGCTGCGCAAGGAA | 30 | 159623 | 159652 | 1 | Watson |
|  |  |  |  |  |  |
| TGACAACGTCGAGCACAGCTGCGCAAGGAAC | 31 | 159623 | 159653 | 1 | Watson |
|  |  |  |  |  |  |
| GACAACGTCGAGCACAGCTGCGCAAGG | 27 | 159624 | 159650 | 2 | Watson |
|  |  |  |  |  |  |
| ACAACGTCGAGCACAGCTGCGCAAGG | 26 | 159625 | 159650 | 1 | Watson |
|  |  |  |  |  |  |
| ACAACGTCGAGCACAGCTGCGCAAGGA | 27 | 159625 | 159651 | 1 | Watson |
|  |  |  |  |  |  |
| CAACGTCGAGCACAGCTGCGCAAGGA | 26 | 159626 | 159651 | 2 | Watson |
|  |  |  |  |  |  |
| CTCGACGTTGTCACTGAAGCGGGAAG | 26 | 159635 | 159610 | 1 | Crick |
|  |  |  |  |  |  |
| TGCGCAGCTGTGCTCGACGTTGTCACTGA | 29 | 159647 | 159619 | 1 | Crick |
|  |  |  |  |  |  |
| TGCAGTTCATTCAGGGCACCGGACA | 25 | 159694 | 159718 | 2 | Watson |
|  |  |  |  |  |  |
| TGCAGTTCATTCAGGGCACCGGACAGG | 27 | 159694 | 159720 | 1 | Watson |
|  |  |  |  |  |  |
| AGTTCATTCAGGGCACCGGACAGGTCGG | 28 | 159697 | 159724 | 1 | Watson |
|  |  |  |  |  |  |
| TCATTCAGGGCACCGGACAGGTCGGT | 26 | 159700 | 159725 | 1 | Watson |
|  |  |  |  |  |  |
| ATGAACTGCAGGACGAGGCA | 20 | 159703 | 159684 | 1 | Crick |
|  |  |  |  |  |  |
| ATGAACTGCAGGACGAGGCAGCGCGGC | 27 | 159703 | 159677 | 1 | Crick |
|  |  |  |  |  |  |
| ATGAACTGCAGGACGAGGCAGCGCGGCTA | 29 | 159703 | 159675 | 1 | Crick |
|  |  |  |  |  |  |
| ATGAACTGCAGGACGAGGCAGCGCGGCTAT | 30 | 159703 | 159674 | 2 | Crick |
|  |  |  |  |  |  |
| TGAATGAACTGCAGGACGAGG | 21 | 159706 | 159686 | 1 | Crick |
|  |  |  |  |  |  |
| CCCTGAATGAACTGCAGGACGA | 22 | 159709 | 159688 | 1 | Crick |
|  |  |  |  |  |  |
| TTGACAAAAAGAACCGGGCGCCCCTG | 26 | 159727 | 159752 | 1 | Watson |
|  |  |  |  |  |  |
| TTGACAAAAAGAACCGGGCGCCCCTGCGCTG | 31 | 159727 | 159757 | 1 | Watson |
|  |  |  |  |  |  |
| TGACAAAAAGAACCGGGCGCCCCTGC | 26 | 159728 | 159753 | 4 | Watson |
|  |  |  |  |  |  |
| TGACAAAAAGAACCGGGCGCCCCTGCG | 27 | 159728 | 159754 | 1 | Watson |
|  |  |  |  |  |  |
| TGACAAAAAGAACCGGGCGCCCCTGCGC | 28 | 159728 | 159755 | 3 | Watson |
|  |  |  |  |  |  |
| TTTTTGTCAAGACCGACCTGTCCGGTGCC | 29 | 159736 | 159708 | 1 | Crick |
|  |  |  |  |  |  |
| CGGCATCAGAGCAGCCGATTGTCTGT | 26 | 159773 | 159798 | 1 | Watson |
|  |  |  |  |  |  |
| TCAGAGCAGCCGATTGTCTGTTGTG | 25 | 159778 | 159802 | 1 | Watson |
|  |  |  |  |  |  |
| TGGGCACAACAGACAATCGGCTGCTCTGA | 29 | 159806 | 159778 | 1 | Crick |
|  |  |  |  |  |  |
| TGGGCACAACAGACAATCGGCTGCTCTGAT | 30 | 159806 | 159777 | 1 | Crick |
|  |  |  |  |  |  |
| TATGACTGGGCACAACAGACAAT | 23 | 159812 | 159790 | 1 | Crick |
|  |  |  |  |  |  |
| TCGGCTATGACTGGGCACAACAGACAA | 27 | 159817 | 159791 | 2 | Crick |
|  |  |  |  |  |  |
| TCGGCTATGACTGGGCACAACAGACAATC | 29 | 159817 | 159789 | 3 | Crick |
|  |  |  |  |  |  |
| TCGGCTATGACTGGGCACAACAGACAATCG | 30 | 159817 | 159788 | 1 | Crick |
|  |  |  |  |  |  |
| TTCGGCTATGACTGGGCACAACAGACAAT | 29 | 159818 | 159790 | 1 | Crick |
|  |  |  |  |  |  |
| TTCGGCTATGACTGGGCACAACAGACAATCG | 31 | 159818 | 159788 | 1 | Crick |
|  |  |  |  |  |  |
| TATTCGGCTATGACTGGGCACAACAG | 26 | 159820 | 159795 | 1 | Crick |
|  |  |  |  |  |  |
| TATTCGGCTATGACTGGGCACAACAGAC | 28 | 159820 | 159793 | 2 | Crick |
|  |  |  |  |  |  |
| TATTCGGCTATGACTGGGCACAACAGACA | 29 | 159820 | 159792 | 1 | Crick |
|  |  |  |  |  |  |
| TATTCGGCTATGACTGGGCACAACAGACAATC | 32 | 159820 | 159789 | 1 | Crick |
|  |  |  |  |  |  |
| GGCTATTCGGCTATGACTGGGCACAACAGA | 30 | 159823 | 159794 | 1 | Crick |
|  |  |  |  |  |  |
| GAGGCTATTCGGCTATGACTGGGCACAAC | 29 | 159825 | 159797 | 1 | Crick |
|  |  |  |  |  |  |
| ATGGATTGCACGCAGGTTCT | 20 | 159862 | 159843 | 1 | Crick |
|  |  |  |  |  |  |
| ATGGATTGCACGCAGGTTCTCCGGCC | 26 | 159862 | 159837 | 1 | Crick |
|  |  |  |  |  |  |
| AACAAGATGGATTGCACGCAGGTTCTCCG | 29 | 159868 | 159840 | 1 | Crick |
|  |  |  |  |  |  |
| GAACAAGATGGATTGCACGCAGGTTCT | 27 | 159869 | 159843 | 1 | Crick |
|  |  |  |  |  |  |
| TGAACAAGATGGATTGCACGCAGGTTCTCC | 30 | 159870 | 159841 | 1 | Crick |
|  |  |  |  |  |  |
| TTGAACAAGATGGATTGCACGCAGG | 25 | 159871 | 159847 | 1 | Crick |
|  |  |  |  |  |  |
| TTGAACAAGATGGATTGCACGCAGGTTC | 28 | 159871 | 159844 | 1 | Crick |
|  |  |  |  |  |  |
| TTGAACAAGATGGATTGCACGCAGGTTCT | 29 | 159871 | 159843 | 2 | Crick |
|  |  |  |  |  |  |
| TTGAACAAGATGGATTGCACGCAGGTTCTC | 30 | 159871 | 159842 | 5 | Crick |
|  |  |  |  |  |  |
| TTGAACAAGATGGATTGCACGCAGGTTCTCC | 31 | 159871 | 159841 | 1 | Crick |
|  |  |  |  |  |  |
| TGGGATCGGCCATTGAACAAGATGGATT | 28 | 159883 | 159856 | 1 | Crick |
|  |  |  |  |  |  |
| TGGGATCGGCCATTGAACAAGATGGATTG | 29 | 159883 | 159855 | 1 | Crick |
|  |  |  |  |  |  |
| TGGGATCGGCCATTGAACAAGATGGATTGC | 30 | 159883 | 159854 | 1 | Crick |
|  |  |  |  |  |  |
| TGGGATCGGCCATTGAACAAGATGGATTGCA | 31 | 159883 | 159853 | 1 | Crick |
|  |  |  |  |  |  |
| ATGGGATCGGCCATTGAACAAGATGGATT | 29 | 159884 | 159856 | 1 | Crick |
|  |  |  |  |  |  |
| TATGGGATCGGCCATTGAACAAGATGG | 27 | 159885 | 159859 | 1 | Crick |
|  |  |  |  |  |  |
| CAATATGGGATCGGCCATTGAACAAGATGG | 30 | 159888 | 159859 | 2 | Crick |

| Small RNAs derived from *EGFP* |  |  |  |  |  |
| --- | --- | --- | --- | --- | --- |
| Sequence | Length | Start | End | Read | Strand |
| TCAGCGTGTCCGGCGAGGGCGA | 22 | 158062 | 158083 | 1 | Watson |
|  |  |  |  |  |  |
| TACGGCAAGCTGACCCTGAAGTTC | 24 | 158097 | 158120 | 1 | Watson |
|  |  |  |  |  |  |
| TACGGCAAGCTGACCCTGAAGTTCA | 25 | 158097 | 158121 | 1 | Watson |
|  |  |  |  |  |  |
| TACGGCAAGCTGACCCTGAAGTTCAT | 26 | 158097 | 158122 | 1 | Watson |
|  |  |  |  |  |  |
| TACGGCAAGCTGACCCTGAAGTTCATC | 27 | 158097 | 158123 | 3 | Watson |
|  |  |  |  |  |  |
| TACGGCAAGCTGACCCTGAAGTTCATCT | 28 | 158097 | 158124 | 2 | Watson |
|  |  |  |  |  |  |
| AGCTGACCCTGAAGTTCATCTGCAC | 25 | 158104 | 158128 | 1 | Watson |
|  |  |  |  |  |  |
| TGACCCTGAAGTTCATCTGCACCACCGG | 28 | 158107 | 158134 | 1 | Watson |
|  |  |  |  |  |  |
| CCCTGAAGTTCATCTGCACCACCGGC | 26 | 158110 | 158135 | 1 | Watson |
|  |  |  |  |  |  |
| TGAAGTTCATCTGCACCACCGGC | 23 | 158113 | 158135 | 2 | Watson |
|  |  |  |  |  |  |
| TGAAGTTCATCTGCACCACCGGCA | 24 | 158113 | 158136 | 1 | Watson |
|  |  |  |  |  |  |
| TGAAGTTCATCTGCACCACCGGCAA | 25 | 158113 | 158137 | 16 | Watson |
|  |  |  |  |  |  |
| TGAAGTTCATCTGCACCACCGGCAAG | 26 | 158113 | 158138 | 18 | Watson |
|  |  |  |  |  |  |
| TGAAGTTCATCTGCACCACCGGCAAGC | 27 | 158113 | 158139 | 23 | Watson |
|  |  |  |  |  |  |
| TGAAGTTCATCTGCACCACCGGCAAGCT | 28 | 158113 | 158140 | 9 | Watson |
|  |  |  |  |  |  |
| TGAAGTTCATCTGCACCACCGGCAAGCTG | 29 | 158113 | 158141 | 4 | Watson |
|  |  |  |  |  |  |
| TGAAGTTCATCTGCACCACCGGCAAGCTGC | 30 | 158113 | 158142 | 1 | Watson |
|  |  |  |  |  |  |
| TGAAGTTCATCTGCACCACCGGCAAGCTGCCC | 32 | 158113 | 158144 | 1 | Watson |
|  |  |  |  |  |  |
| GAAGTTCATCTGCACCACCGGCAAGCTG | 28 | 158114 | 158141 | 1 | Watson |
|  |  |  |  |  |  |
| TCGTGACCACCCTGACCTACGGCG | 24 | 158161 | 158184 | 1 | Watson |
|  |  |  |  |  |  |
| TCGTGACCACCCTGACCTACGGCGT | 25 | 158161 | 158185 | 4 | Watson |
|  |  |  |  |  |  |
| TCGTGACCACCCTGACCTACGGCGTG | 26 | 158161 | 158186 | 2 | Watson |
|  |  |  |  |  |  |
| TCGTGACCACCCTGACCTACGGCGTGC | 27 | 158161 | 158187 | 1 | Watson |
|  |  |  |  |  |  |
| CGTGACCACCCTGACCTACGGCGTGC | 26 | 158162 | 158187 | 1 | Watson |
|  |  |  |  |  |  |
| TGACCACCCTGACCTACGGCGTGCAGTGC | 29 | 158164 | 158192 | 1 | Watson |
|  |  |  |  |  |  |
| TGACCTACGGCGTGCAGTGCTTCA | 24 | 158173 | 158196 | 2 | Watson |
|  |  |  |  |  |  |
| TGACCTACGGCGTGCAGTGCTTCAG | 25 | 158173 | 158197 | 1 | Watson |
|  |  |  |  |  |  |
| TGACCTACGGCGTGCAGTGCTTCAGCC | 27 | 158173 | 158199 | 2 | Watson |
|  |  |  |  |  |  |
| CAGGGTGGTCACGAGGGTGGG | 21 | 158174 | 158154 | 1 | Crick |
|  |  |  |  |  |  |
| CAGGGTGGTCACGAGGGTGGGC | 22 | 158174 | 158153 | 1 | Crick |
|  |  |  |  |  |  |
| TACGGCGTGCAGTGCTTCAGCCGC | 24 | 158178 | 158201 | 1 | Watson |
|  |  |  |  |  |  |
| TACGGCGTGCAGTGCTTCAGCCGCT | 25 | 158178 | 158202 | 2 | Watson |
|  |  |  |  |  |  |
| TACGGCGTGCAGTGCTTCAGCCGCTA | 26 | 158178 | 158203 | 1 | Watson |
|  |  |  |  |  |  |
| CATGAAGCAGCACGACTTCTTCAAGT | 26 | 158213 | 158238 | 1 | Watson |
|  |  |  |  |  |  |
| TGAAGCAGCACGACTTCTTCAAGTCCGC | 28 | 158215 | 158242 | 1 | Watson |
|  |  |  |  |  |  |
| TTCATGTGGTCGGGGTAGCGGCTGAAGCAC | 30 | 158218 | 158189 | 1 | Crick |
|  |  |  |  |  |  |
| TTCAAGTCCGCCATGCCCGAAGGCT | 25 | 158232 | 158256 | 1 | Watson |
|  |  |  |  |  |  |
| CGGACTTGAAGAAGTCGTGCTGCT | 24 | 158241 | 158218 | 1 | Crick |
|  |  |  |  |  |  |
| CGGACTTGAAGAAGTCGTGCTGCTT | 25 | 158241 | 158217 | 1 | Crick |
|  |  |  |  |  |  |
| CGGACTTGAAGAAGTCGTGCTGCTTC | 26 | 158241 | 158216 | 2 | Crick |
|  |  |  |  |  |  |
| CGGACTTGAAGAAGTCGTGCTGCTTCA | 27 | 158241 | 158215 | 7 | Crick |
|  |  |  |  |  |  |
| CGGACTTGAAGAAGTCGTGCTGCTTCAT | 28 | 158241 | 158214 | 4 | Crick |
|  |  |  |  |  |  |
| CGGACTTGAAGAAGTCGTGCTGCTTCATG | 29 | 158241 | 158213 | 1 | Crick |
|  |  |  |  |  |  |
| CGGACTTGAAGAAGTCGTGCTGCTTCATGT | 30 | 158241 | 158212 | 70 | Crick |
|  |  |  |  |  |  |
| CGGACTTGAAGAAGTCGTGCTGCTTCATGTG | 31 | 158241 | 158211 | 75 | Crick |
|  |  |  |  |  |  |
| GCGGACTTGAAGAAGTCGTGCTGCTTCAT | 29 | 158242 | 158214 | 2 | Crick |
|  |  |  |  |  |  |
| GCGGACTTGAAGAAGTCGTGCTGCTTCATG | 30 | 158242 | 158213 | 5 | Crick |
|  |  |  |  |  |  |
| GCGGACTTGAAGAAGTCGTGCTGCTTCATGT | 31 | 158242 | 158212 | 3 | Crick |
|  |  |  |  |  |  |
| GCGGACTTGAAGAAGTCGTGCTGCTTCATGTG | 32 | 158242 | 158211 | 1 | Crick |
|  |  |  |  |  |  |
| ATCTTCTTCAAGGACGACGGCAA | 23 | 158274 | 158296 | 1 | Watson |
|  |  |  |  |  |  |
| ATCTTCTTCAAGGACGACGGCAACTACAA | 29 | 158274 | 158302 | 1 | Watson |
|  |  |  |  |  |  |
| TCTTCTTCAAGGACGACGGCA | 21 | 158275 | 158295 | 1 | Watson |
|  |  |  |  |  |  |
| TCTTCTTCAAGGACGACGGCAACTA | 25 | 158275 | 158299 | 1 | Watson |
|  |  |  |  |  |  |
| TCTTCTTCAAGGACGACGGCAACTAC | 26 | 158275 | 158300 | 20 | Watson |
|  |  |  |  |  |  |
| TCTTCTTCAAGGACGACGGCAACTACA | 27 | 158275 | 158301 | 20 | Watson |
|  |  |  |  |  |  |
| TCTTCTTCAAGGACGACGGCAACTACAA | 28 | 158275 | 158302 | 10 | Watson |
|  |  |  |  |  |  |
| TCTTCTTCAAGGACGACGGCAACTACAAG | 29 | 158275 | 158303 | 10 | Watson |
|  |  |  |  |  |  |
| TCTTCTTCAAGGACGACGGCAACTACAAGA | 30 | 158275 | 158304 | 13 | Watson |
|  |  |  |  |  |  |
| CTTCTTCAAGGACGACGGCAACTACA | 26 | 158276 | 158301 | 2 | Watson |
|  |  |  |  |  |  |
| CTTCTTCAAGGACGACGGCAACTACAAGA | 29 | 158276 | 158304 | 1 | Watson |
|  |  |  |  |  |  |
| TTCTTCAAGGACGACGGCAACTA | 23 | 158277 | 158299 | 1 | Watson |
|  |  |  |  |  |  |
| TTCTTCAAGGACGACGGCAACTAC | 24 | 158277 | 158300 | 7 | Watson |
|  |  |  |  |  |  |
| TTCTTCAAGGACGACGGCAACTACA | 25 | 158277 | 158301 | 21 | Watson |
|  |  |  |  |  |  |
| TTCTTCAAGGACGACGGCAACTACAA | 26 | 158277 | 158302 | 24 | Watson |
|  |  |  |  |  |  |
| TTCTTCAAGGACGACGGCAACTACAAG | 27 | 158277 | 158303 | 6 | Watson |
|  |  |  |  |  |  |
| TTCTTCAAGGACGACGGCAACTACAAGA | 28 | 158277 | 158304 | 14 | Watson |
|  |  |  |  |  |  |
| TTCTTCAAGGACGACGGCAACTACAAGAC | 29 | 158277 | 158305 | 8 | Watson |
|  |  |  |  |  |  |
| TTCTTCAAGGACGACGGCAACTACAAGACC | 30 | 158277 | 158306 | 8 | Watson |
|  |  |  |  |  |  |
| TTCTTCAAGGACGACGGCAACTACAAGACCC | 31 | 158277 | 158307 | 9 | Watson |
|  |  |  |  |  |  |
| TCTTCAAGGACGACGGCAACTA | 22 | 158278 | 158299 | 1 | Watson |
|  |  |  |  |  |  |
| TCTTCAAGGACGACGGCAACTAC | 23 | 158278 | 158300 | 1 | Watson |
|  |  |  |  |  |  |
| TCTTCAAGGACGACGGCAACTACA | 24 | 158278 | 158301 | 5 | Watson |
|  |  |  |  |  |  |
| TCTTCAAGGACGACGGCAACTACAA | 25 | 158278 | 158302 | 19 | Watson |
|  |  |  |  |  |  |
| TCTTCAAGGACGACGGCAACTACAAG | 26 | 158278 | 158303 | 15 | Watson |
|  |  |  |  |  |  |
| TCTTCAAGGACGACGGCAACTACAAGA | 27 | 158278 | 158304 | 59 | Watson |
|  |  |  |  |  |  |
| TCTTCAAGGACGACGGCAACTACAAGAC | 28 | 158278 | 158305 | 32 | Watson |
|  |  |  |  |  |  |
| TCTTCAAGGACGACGGCAACTACAAGACC | 29 | 158278 | 158306 | 18 | Watson |
|  |  |  |  |  |  |
| TCTTCAAGGACGACGGCAACTACAAGACCC | 30 | 158278 | 158307 | 23 | Watson |
|  |  |  |  |  |  |
| TCTTCAAGGACGACGGCAACTACAAGACCCG | 31 | 158278 | 158308 | 9 | Watson |
|  |  |  |  |  |  |
| CTTCAAGGACGACGGCAACTACAAGACC | 28 | 158279 | 158306 | 2 | Watson |
|  |  |  |  |  |  |
| TTCAAGGACGACGGCAACTAC | 21 | 158280 | 158300 | 1 | Watson |
|  |  |  |  |  |  |
| TTCAAGGACGACGGCAACTACA | 22 | 158280 | 158301 | 3 | Watson |
|  |  |  |  |  |  |
| TTCAAGGACGACGGCAACTACAA | 23 | 158280 | 158302 | 1 | Watson |
|  |  |  |  |  |  |
| TTCAAGGACGACGGCAACTACAAG | 24 | 158280 | 158303 | 1 | Watson |
|  |  |  |  |  |  |
| TTCAAGGACGACGGCAACTACAAGA | 25 | 158280 | 158304 | 16 | Watson |
|  |  |  |  |  |  |
| TTCAAGGACGACGGCAACTACAAGAC | 26 | 158280 | 158305 | 46 | Watson |
|  |  |  |  |  |  |
| TTCAAGGACGACGGCAACTACAAGACC | 27 | 158280 | 158306 | 134 | Watson |
|  |  |  |  |  |  |
| TTCAAGGACGACGGCAACTACAAGACCC | 28 | 158280 | 158307 | 140 | Watson |
|  |  |  |  |  |  |
| TTCAAGGACGACGGCAACTACAAGACCCG | 29 | 158280 | 158308 | 22 | Watson |
|  |  |  |  |  |  |
| TTCAAGGACGACGGCAACTACAAGACCCGC | 30 | 158280 | 158309 | 59 | Watson |
|  |  |  |  |  |  |
| TCAAGGACGACGGCAACTACAAGA | 24 | 158281 | 158304 | 1 | Watson |
|  |  |  |  |  |  |
| TCAAGGACGACGGCAACTACAAGAC | 25 | 158281 | 158305 | 1 | Watson |
|  |  |  |  |  |  |
| TCAAGGACGACGGCAACTACAAGACC | 26 | 158281 | 158306 | 5 | Watson |
|  |  |  |  |  |  |
| TCAAGGACGACGGCAACTACAAGACCC | 27 | 158281 | 158307 | 4 | Watson |
|  |  |  |  |  |  |
| TCAAGGACGACGGCAACTACAAGACCCG | 28 | 158281 | 158308 | 1 | Watson |
|  |  |  |  |  |  |
| CAAGGACGACGGCAACTACAAGACC | 25 | 158282 | 158306 | 1 | Watson |
|  |  |  |  |  |  |
| CAAGGACGACGGCAACTACAAGACCC | 26 | 158282 | 158307 | 3 | Watson |
|  |  |  |  |  |  |
| AAGGACGACGGCAACTACAAGACC | 24 | 158283 | 158306 | 4 | Watson |
|  |  |  |  |  |  |
| AAGGACGACGGCAACTACAAGACCC | 25 | 158283 | 158307 | 4 | Watson |
|  |  |  |  |  |  |
| AAGGACGACGGCAACTACAAGACCCGC | 27 | 158283 | 158309 | 3 | Watson |
|  |  |  |  |  |  |
| TTGAAGAAGATGGTGCGCTCCTGGACGT | 28 | 158284 | 158257 | 1 | Crick |
|  |  |  |  |  |  |
| TTGAAGAAGATGGTGCGCTCCTGGACGTA | 29 | 158284 | 158256 | 4 | Crick |
|  |  |  |  |  |  |
| CCTTGAAGAAGATGGTGCGCTCCTGGAC | 28 | 158286 | 158259 | 1 | Crick |
|  |  |  |  |  |  |
| TCCTTGAAGAAGATGGTGCGCTCCTGGAC | 29 | 158287 | 158259 | 3 | Crick |
|  |  |  |  |  |  |
| TCCTTGAAGAAGATGGTGCGCTCCTGGACG | 30 | 158287 | 158258 | 1 | Crick |
|  |  |  |  |  |  |
| GGGTCTTGTAGTTGCCGTCGTCCTTGAAG | 29 | 158307 | 158279 | 1 | Crick |
|  |  |  |  |  |  |
| GGGTCTTGTAGTTGCCGTCGTCCTTGAAGA | 30 | 158307 | 158278 | 1 | Crick |
|  |  |  |  |  |  |
| TGAAGTTCGAGGGCGACACCCTGGT | 25 | 158317 | 158341 | 1 | Watson |
|  |  |  |  |  |  |
| TGGTGAACCGCATCGAGCTGAAG | 23 | 158338 | 158360 | 1 | Watson |
|  |  |  |  |  |  |
| TGGTGAACCGCATCGAGCTGAAGG | 24 | 158338 | 158361 | 21 | Watson |
|  |  |  |  |  |  |
| TGGTGAACCGCATCGAGCTGAAGGG | 25 | 158338 | 158362 | 9 | Watson |
|  |  |  |  |  |  |
| TGGTGAACCGCATCGAGCTGAAGGGC | 26 | 158338 | 158363 | 5 | Watson |
|  |  |  |  |  |  |
| TGGTGAACCGCATCGAGCTGAAGGGCA | 27 | 158338 | 158364 | 1 | Watson |
|  |  |  |  |  |  |
| TGGTGAACCGCATCGAGCTGAAGGGCAT | 28 | 158338 | 158365 | 3 | Watson |
|  |  |  |  |  |  |
| TGGTGAACCGCATCGAGCTGAAGGGCATC | 29 | 158338 | 158366 | 3 | Watson |
|  |  |  |  |  |  |
| GGTGAACCGCATCGAGCTGAAGG | 23 | 158339 | 158361 | 1 | Watson |
|  |  |  |  |  |  |
| GTGAACCGCATCGAGCTGAAGGGCATC | 27 | 158340 | 158366 | 1 | Watson |
|  |  |  |  |  |  |
| TGAACCGCATCGAGCTGAAGGGCAT | 25 | 158341 | 158365 | 2 | Watson |
|  |  |  |  |  |  |
| TGAACCGCATCGAGCTGAAGGGCATC | 26 | 158341 | 158366 | 2 | Watson |
|  |  |  |  |  |  |
| GAACCGCATCGAGCTGAAGGGCATC | 25 | 158342 | 158366 | 1 | Watson |
|  |  |  |  |  |  |
| TCGACTTCAAGGAGGACGGCAACATCCTGG | 30 | 158365 | 158394 | 1 | Watson |
|  |  |  |  |  |  |
| TTCAAGGAGGACGGCAACATCCT | 23 | 158370 | 158392 | 1 | Watson |
|  |  |  |  |  |  |
| TTCAAGGAGGACGGCAACATCCTGG | 25 | 158370 | 158394 | 2 | Watson |
|  |  |  |  |  |  |
| TCAAGGAGGACGGCAACATCCTGG | 24 | 158371 | 158394 | 2 | Watson |
|  |  |  |  |  |  |
| CAAGGAGGACGGCAACATCCTGGG | 24 | 158372 | 158395 | 1 | Watson |
|  |  |  |  |  |  |
| AAGGAGGACGGCAACATCCTGG | 22 | 158373 | 158394 | 1 | Watson |
|  |  |  |  |  |  |
| AGGAGGACGGCAACATCCTGGG | 22 | 158374 | 158395 | 1 | Watson |
|  |  |  |  |  |  |
| TGGGGCACAAGCTGGAGTACAACTAC | 26 | 158392 | 158417 | 1 | Watson |
|  |  |  |  |  |  |
| TGGAGTACAACTACAACAGCCACAACG | 27 | 158404 | 158430 | 2 | Watson |
|  |  |  |  |  |  |
| TGGAGTACAACTACAACAGCCACAACGTC | 29 | 158404 | 158432 | 6 | Watson |
|  |  |  |  |  |  |
| TGGAGTACAACTACAACAGCCACAACGTCTA | 31 | 158404 | 158434 | 1 | Watson |
|  |  |  |  |  |  |
| GTACAACTACAACAGCCACAACGTCTA | 27 | 158408 | 158434 | 1 | Watson |
|  |  |  |  |  |  |
| TTGTCGGCCATGATATAGACGTTGT | 25 | 158449 | 158425 | 1 | Crick |
|  |  |  |  |  |  |
| CAGAAGAACGGCATCAAGGTGAACTTC | 27 | 158451 | 158477 | 1 | Watson |
|  |  |  |  |  |  |
| GAAGAACGGCATCAAGGTGAACTTC | 25 | 158453 | 158477 | 1 | Watson |
|  |  |  |  |  |  |
| GAAGAACGGCATCAAGGTGAACTTCA | 26 | 158453 | 158478 | 1 | Watson |
|  |  |  |  |  |  |
| GAAGAACGGCATCAAGGTGAACTTCAA | 27 | 158453 | 158479 | 7 | Watson |
|  |  |  |  |  |  |
| GAAGAACGGCATCAAGGTGAACTTCAAG | 28 | 158453 | 158480 | 2 | Watson |
|  |  |  |  |  |  |
| GAAGAACGGCATCAAGGTGAACTTCAAGA | 29 | 158453 | 158481 | 2 | Watson |
|  |  |  |  |  |  |
| GAAGAACGGCATCAAGGTGAACTTCAAGAT | 30 | 158453 | 158482 | 2 | Watson |
|  |  |  |  |  |  |
| GAAGAACGGCATCAAGGTGAACTTCAAGATC | 31 | 158453 | 158483 | 1 | Watson |
|  |  |  |  |  |  |
| AAGAACGGCATCAAGGTGAACTTCAA | 26 | 158454 | 158479 | 1 | Watson |
|  |  |  |  |  |  |
| AAGAACGGCATCAAGGTGAACTTCAAG | 27 | 158454 | 158480 | 4 | Watson |
|  |  |  |  |  |  |
| AAGAACGGCATCAAGGTGAACTTCAAGA | 28 | 158454 | 158481 | 6 | Watson |
|  |  |  |  |  |  |
| AAGAACGGCATCAAGGTGAACTTCAAGAT | 29 | 158454 | 158482 | 3 | Watson |
|  |  |  |  |  |  |
| AGAACGGCATCAAGGTGAACTTCAAGAT | 28 | 158455 | 158482 | 2 | Watson |
|  |  |  |  |  |  |
| GAACGGCATCAAGGTGAACTTCAAG | 25 | 158456 | 158480 | 1 | Watson |
|  |  |  |  |  |  |
| GAACGGCATCAAGGTGAACTTCAAGA | 26 | 158456 | 158481 | 2 | Watson |
|  |  |  |  |  |  |
| GAACGGCATCAAGGTGAACTTCAAGATC | 28 | 158456 | 158483 | 1 | Watson |
|  |  |  |  |  |  |
| AACGGCATCAAGGTGAACTTCAAGATC | 27 | 158457 | 158483 | 1 | Watson |
|  |  |  |  |  |  |
| ACGGCATCAAGGTGAACTTCAAGATCC | 27 | 158458 | 158484 | 1 | Watson |
|  |  |  |  |  |  |
| ACGGCATCAAGGTGAACTTCAAGATCCGCC | 30 | 158458 | 158487 | 1 | Watson |
|  |  |  |  |  |  |
| CGGCATCAAGGTGAACTTCAAGATCC | 26 | 158459 | 158484 | 1 | Watson |
|  |  |  |  |  |  |
| GGCATCAAGGTGAACTTCAAGATCC | 25 | 158460 | 158484 | 1 | Watson |
|  |  |  |  |  |  |
| TGAACTTCAAGATCCGCCACAACATC | 26 | 158470 | 158495 | 4 | Watson |
|  |  |  |  |  |  |
| CAAGATCCGCCACAACATCGAGGACG | 26 | 158477 | 158502 | 1 | Watson |
|  |  |  |  |  |  |
| CAACATCGAGGACGGCAGCGTGCA | 24 | 158489 | 158512 | 1 | Watson |
|  |  |  |  |  |  |
| CAACATCGAGGACGGCAGCGTGCAG | 25 | 158489 | 158513 | 1 | Watson |
|  |  |  |  |  |  |
| CAACATCGAGGACGGCAGCGTGCAGC | 26 | 158489 | 158514 | 2 | Watson |
|  |  |  |  |  |  |
| TCGAGGACGGCAGCGTGCAGCTCG | 24 | 158494 | 158517 | 1 | Watson |
|  |  |  |  |  |  |
| TCGAGGACGGCAGCGTGCAGCTCGC | 25 | 158494 | 158518 | 1 | Watson |
|  |  |  |  |  |  |
| TACCAGCAGAACACCCCCATCGGCGA | 26 | 158526 | 158551 | 4 | Watson |
|  |  |  |  |  |  |
| TACCAGCAGAACACCCCCATCGGCGAC | 27 | 158526 | 158552 | 1 | Watson |
|  |  |  |  |  |  |
| TACCAGCAGAACACCCCCATCGGCGACGGCC | 31 | 158526 | 158556 | 1 | Watson |
|  |  |  |  |  |  |
| TCTGCTGGTAGTGGTCGGCGAGCTGCAC | 28 | 158535 | 158508 | 1 | Crick |
|  |  |  |  |  |  |
| TCTGCTGGTAGTGGTCGGCGAGCTGCACGC | 30 | 158535 | 158506 | 2 | Crick |
|  |  |  |  |  |  |
| TGCTGCCCGACAACCACTACCTGAGCAC | 28 | 158563 | 158590 | 1 | Watson |
|  |  |  |  |  |  |
| TGAGCAAAGACCCCAACGAGAAGCGCGA | 28 | 158602 | 158629 | 2 | Watson |
|  |  |  |  |  |  |
| TGAGCAAAGACCCCAACGAGAAGCGCGAT | 29 | 158602 | 158630 | 1 | Watson |
|  |  |  |  |  |  |
| TGAGCAAAGACCCCAACGAGAAGCGCGATC | 30 | 158602 | 158631 | 1 | Watson |
|  |  |  |  |  |  |
| CGAGAAGCGCGATCACATGGTCCTG | 25 | 158618 | 158642 | 1 | Watson |
|  |  |  |  |  |  |
| GCGCTTCTCGTTGGGGTCTT | 20 | 158627 | 158608 | 1 | Crick |
|  |  |  |  |  |  |
| TCCTGCTGGAGTTCGTGACCG | 21 | 158638 | 158658 | 1 | Watson |
|  |  |  |  |  |  |
| TGCTGGAGTTCGTGACCGCCGCCGG | 25 | 158641 | 158665 | 2 | Watson |
|  |  |  |  |  |  |
| TGCTGGAGTTCGTGACCGCCGCCGGGA | 27 | 158641 | 158667 | 1 | Watson |
|  |  |  |  |  |  |
| TCCAGCAGGACCATGTGATCGCGCTTCTC | 29 | 158647 | 158619 | 1 | Crick |
|  |  |  |  |  |  |
| AACTCCAGCAGGACCATGTGATCGCGCTTCTC | 32 | 158650 | 158619 | 1 | Crick |
|  |  |  |  |  |  |
| ACGAACTCCAGCAGGACCATGTGATCGC | 28 | 158653 | 158626 | 1 | Crick |
|  |  |  |  |  |  |
| ACGAACTCCAGCAGGACCATGTGATCGCGC | 30 | 158653 | 158624 | 1 | Crick |
|  |  |  |  |  |  |
| CACGAACTCCAGCAGGACCATGTGATCGCGCT | 32 | 158654 | 158623 | 1 | Crick |
|  |  |  |  |  |  |
| GCGGTCACGAACTCCAGCAGGACCATG | 27 | 158659 | 158633 | 1 | Crick |
|  |  |  |  |  |  |
| TCCCGGCGGCGGTCACGAACTCCAGCAGGA | 30 | 158667 | 158638 | 1 | Crick |
|  |  |  |  |  |  |
| TCACTCTCGGCATGGACGAGCTG | 23 | 158668 | 158690 | 1 | Watson |
|  |  |  |  |  |  |
| ACTCTCGGCATGGACGAGCTGTACCA | 26 | 158670 | 158695 | 1 | Watson |
|  |  |  |  |  |  |
| CTCTCGGCATGGACGAGCTG | 20 | 158671 | 158690 | 4 | Watson |
|  |  |  |  |  |  |
| CTCTCGGCATGGACGAGCTGT | 21 | 158671 | 158691 | 1 | Watson |
|  |  |  |  |  |  |
| TCTCGGCATGGACGAGCTGT | 20 | 158672 | 158691 | 5 | Watson |
|  |  |  |  |  |  |
| TCTCGGCATGGACGAGCTGTACC | 23 | 158672 | 158694 | 1 | Watson |
|  |  |  |  |  |  |
| TCTCGGCATGGACGAGCTGTACCAAT | 26 | 158672 | 158697 | 1 | Watson |
|  |  |  |  |  |  |
| TCTCGGCATGGACGAGCTGTACCAATTC | 28 | 158672 | 158699 | 1 | Watson |
|  |  |  |  |  |  |
| TCTCGGCATGGACGAGCTGTACCAATTCGA | 30 | 158672 | 158701 | 6 | Watson |
|  |  |  |  |  |  |
| TCTCGGCATGGACGAGCTGTACCAATTCGAT | 31 | 158672 | 158702 | 3 | Watson |
|  |  |  |  |  |  |
| TCTCGGCATGGACGAGCTGTACCAATTCGATC | 32 | 158672 | 158703 | 3 | Watson |
|  |  |  |  |  |  |
| TCTCGGCATGGACGAGCTGTACCAATTCGATCT | 33 | 158672 | 158704 | 1 | Watson |
|  |  |  |  |  |  |
| TCGGCATGGACGAGCTGTACCAATTC | 26 | 158674 | 158699 | 2 | Watson |
|  |  |  |  |  |  |
| TCGGCATGGACGAGCTGTACCAATTCGA | 28 | 158674 | 158701 | 2 | Watson |
|  |  |  |  |  |  |
| TCGGCATGGACGAGCTGTACCAATTCGAT | 29 | 158674 | 158702 | 3 | Watson |
|  |  |  |  |  |  |
| TCGGCATGGACGAGCTGTACCAATTCGATC | 30 | 158674 | 158703 | 2 | Watson |
|  |  |  |  |  |  |
| GCATGGACGAGCTGTACCAATTCGATC | 27 | 158677 | 158703 | 1 | Watson |
|  |  |  |  |  |  |
| TGGACGAGCTGTACCAATTCGATCTAGT | 28 | 158680 | 158707 | 1 | Watson |
|  |  |  |  |  |  |
| TACCAATTCGATCTAGTGAACCTCTTCGAGG | 31 | 158691 | 158721 | 2 | Watson |
