# Supplementary material for: Targeted gene silencing in mouse germ cells by insertion of a homologous DNA into a piRNA generating locus
Source: HighWire-hosted journal article supplement (doi:10.1101/gr.137224.112), 2012-11-06
Supplement: Supplemental_Table_4.docx [file Supplemental_Table_4.docx]

| **Supplementary Table 4** Primer Sequences. |  |
| --- | --- |
|  |  |
| Construction of the knock-in vector |  |
| Long arm forward | AGATGAGAATTCTGTAGACTGGTCACAGCAGCTGACAC |
| Long arm reverse | AGATGAGAATTCGCAAAACCTCTCAGGCTACACAGAC |
| Short arm forward | CAACTGGTTTCTCGAGTGAATGTCTGTGTAGCCTGAGAGGT |
| Short arm reverse | TGACAGAAGGTCGACGACAGCCTAGGGAGTAGGCAGAG |
|  |  |
| Genotyping knock-in mice |  |
| 5’ probe forward (for Southern) | TCCGCTGTGTGAACTCTACAGTCAGCA |
| 5’ probe reverse | CAGACCCTGGAGAAGAATGTGAGAC |
| Internal probe forward (for Southern) | GCACTCACCTGCTGTTTGAA |
| Internal probe reverse | ATCTTGGTGTGGGGACAGAG |
| 3' probe forward (for Southern) | CCATCCTCTTTGCATTCCAT |
| 3’ probe reverse | CAGCCAATGAAACAAGCTCA |
| Genotyping forward | TTCAAAACCTGGCTCATCTTCA |
| Genotyping reverse 1 (common) | CTTCTCACAGTGGTGCCTATGG |
| Genotyping reverse 2 (knock-in specific) | TGCACGAGACTAGTGAGACGTG |
|  |  |
| Construction of the Flag-Piwil2 BAC transgene |  |
| Internal forward | ATGAGCGGCCGCGATGGATCCTGTCAGGCGTTGT |
| Internal reverse | ATGCGAATTCAACAGCCCTTGATTATACAGCTAG |
| External forward | TGGCAGATAAGGAATTGGAACAGAACCAACAGTCGTTTCTACAGCCTCTCAATGGACTACAAAGACCATGAC |
| External reverse | CCACAAAATGCAATTACTTGTCAACACAAACCAAAGATTAAAAATGTGTAGGCTGGAGCTGCTTC |
|  |  |
| Genotyping Flag-Piwil2 BAC transgenic mice |  |
| Genotyping forward | TATAGCCAAAGATTAATGCATCTCTC |
| Genotyping reverse | TAAAACCGCCCCAAGTCCATCTAGTGT |
|  |  |
| qRT-PCR analysis |  |
| beta-geo forward | GCTGCATAAACCGACTACACAAATC |
| beta-geo reverse | TCACCCTGCCATAAAGAAACTGTTA |
| EGFP forward | GTGAGCAAGGGCGAGGAG |
| EGFP reverse | TCCAGCTCGACCAGGATG |
| Piwil2 forward | TGAGCCCTGATCACATGCAG |
| Piwil2 reverse | GGAGCTGGAACTCGGATGGT |
| beta-actin forward | ACAGCTTCTTTGCAGCTCCT |
| beta-actin reverse | ATTCCCACCATCACACCCTG |
|  |  |
| piRNA northern blotting |  |
| Endogenous piRNA | CCACCACATCCCTGACTTTCACTTA |
| 5S RNA | CCTGCTTAGCTTCCGAGATCAG |
|  |  |
| Bisulfite Sequencing |  |
| beta-geo forward | ATTATTAGTTGGTTTGGTGTTAGGG |
| beta-geo reverse | TTATCTATTATACCCAATCATAACC |
|  |  |
